# Supplementary material for: CDK9 and SPT5 proteins are specifically required for expression of herpes simplex virus 1 replication-dependent late genes
Source: PubMed Central journal article supplement (PMC5602406; doi:10.1074/jbc.m117.806000), 2017-07-25
Supplement: 10.1074_M117.806000_jbc.M117.806000-1.pdf [file 10.1074_M117.806000_jbc.M117.806000-1.pdf]

Figure S1

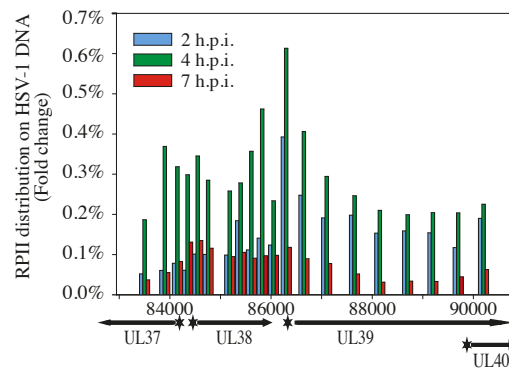

ChIP against RNA polymerase II was performed in 1BR.3.N cells infected with HSV-1 in at 37°C using a m.o.i. of 10. Virus was added to cells at 0 hour and cells were harvested at 2 (blue), 4 (green) and 7 (red) h.p.i.. The values show specific enrichment of RNA polymerase II bound to DNA as percentage of input DNA.
