# Supplementary material for: CDK9 and SPT5 proteins are specifically required for expression of herpes simplex virus 1 replication-dependent late genes
Source: PubMed Central journal article supplement (PMC5602406; doi:10.1074/jbc.m117.806000), 2017-07-25
Supplement: 10.1074_M117.806000_jbc.M117.806000-2.pdf [file 10.1074_M117.806000_jbc.M117.806000-2.pdf]

Figure S2

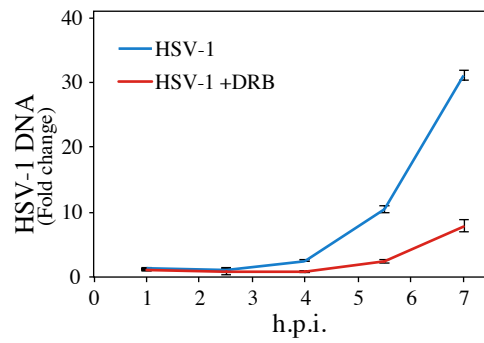

HSV-1 DNA replication was measured by quantitative PCR in the presence of 25  $\mu$ M DRB or DMSO. The results were normalized to the 1 h.p.i. and displayed as fold change. The mean value of two independent experiments is displayed and error bars indicate the
