# Supplementary material for: CDK9 and SPT5 proteins are specifically required for expression of herpes simplex virus 1 replication-dependent late genes
Source: PubMed Central journal article supplement (PMC5602406; doi:10.1074/jbc.m117.806000), 2017-07-25
Supplement: 10.1074_M117.806000_jbc.M117.806000-3.pdf [file 10.1074_M117.806000_jbc.M117.806000-3.pdf]

Figure S3

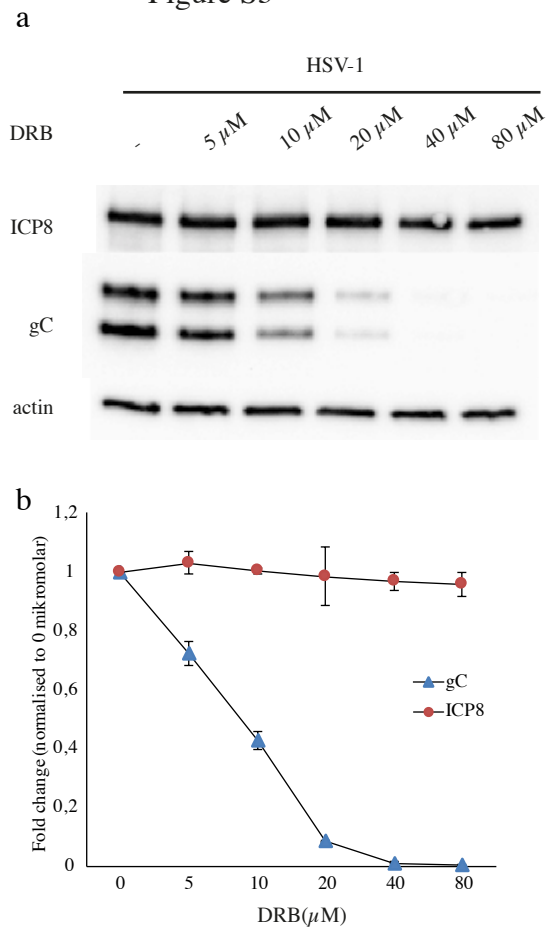

**(a)** HSV-1 gene expression was measured at 19 h.p.i. at a m.o.i. of 10 by immunoblotting in the presence of the indicated concentration of DRB or DMSO. **(b)** Quantification shows the mean value of two independent experiments and is normalized to the mock treated infections. Error bars indicate the variation.
