# Supplementary material for: CDK9 and SPT5 proteins are specifically required for expression of herpes simplex virus 1 replication-dependent late genes
Source: PubMed Central journal article supplement (PMC5602406; doi:10.1074/jbc.m117.806000), 2017-07-25
Supplement: 10.1074_M117.806000_jbc.M117.806000-4.pdf [file 10.1074_M117.806000_jbc.M117.806000-4.pdf]

Table S1

| Name                                                                                  | Sequence (5'-3')             | Position | Product |
|---------------------------------------------------------------------------------------|------------------------------|----------|---------|
| ChIP 1 (Figure 1)                                                                     |                              |          |         |
| UL38_promoter primer-pair was also used for quantification of DNA (Figure 2B, 6B & 7) |                              |          |         |
| ICP4_promoter_F                                                                       | GGGTCGTGCATAATGGAA           | 146679   | 195bp   |
| ICP4_promoter_R                                                                       | CGTCTGACGGTCTGTCTCT          | 146874   |         |
| UL23_promoter_F                                                                       | AGTTTCACGCCACCAAGATCTGC      | 47840    | 150bp   |
| UL23_promoter_R                                                                       | AATTCGAACACGCAGATGCAGTCG     | 47990    |         |
| UL38_promoter_F                                                                       | GTGGGTTGCGGACTTTCTG          | 84324    | 94bp    |
| UL38_promoter_R                                                                       | CTCCGGTGGGTTGTGTTG           | 84418    |         |
| RT-qPCR (Figure 8A & 9)                                                               |                              |          |         |
| UL23_middle_F                                                                         | CCCAACACGATGTTTGTGC          | 47186    | 152bp   |
| UL23_middle_R                                                                         | GGCCCTCACCCATCTT             | 47338    |         |
| UL23_probe                                                                            | FAM-ATGCTGCCATAAGGTATCG-BHQ1 | 47258    |         |
| UL38_middle_F                                                                         | CTGGATCGTTTTCCGAGTG          | 85197    | 116bp   |
| UL38_middle_R                                                                         | GCTCGTAGCTCGTCCTG            | 85313    |         |
| UL38_probe                                                                            | HEX-ATGGTTCACACGCACGTCT-BHQ1 | 85227    |         |
| ChIP 2 (Figure 2A & 3)                                                                |                              |          |         |
| UL37_1_F                                                                              | GAGCGACGTCTCCCAAG            | 83476    | 71bp    |
| UL37_1_R                                                                              | CAAACCGTCACCAAGAGCTG         | 83547    |         |
| UL37_2_F                                                                              | TTCCCGACAACAGAAACG           | 83868    | 153bp   |
| UL37_2_R                                                                              | TCGGACGGACCTATGCAG           | 84021    |         |
| UL37_3_F                                                                              | CGTAGACCAACGACGAGACC         | 84114    | 63bp    |
| UL37_3_R                                                                              | GATAATTCGCGCTCCCTAC          | 84177    |         |
| UL38_A_F                                                                              | GTGGGTTGCGGACTTTCTG          | 84324    | 85bp    |
| UL38_A_R                                                                              | GTTGTGTTGGCCGACTGG           | 84409    |         |
| UL38_B_F                                                                              | GGTCGCAATGAAGACCAATC         | 84524    | 89bp    |
| UL38_B_R                                                                              | GCGGTATCGCGTGTGTTG           | 84613    |         |
| UL38_C_F                                                                              | CACGCTGTGGTTGCTTGG           | 84710    | 76bp    |
| UL38_C_R                                                                              | CCTGTTCGGTATCGTCGTTG         | 84786    |         |
| UL38_D_F                                                                              | AGGCCCTGGACAAGATCC           | 84784    | 107bp   |
| UL38_D_R                                                                              | GTTGGCACAGATCCGTCAG          | 84891    |         |
| UL38_E_F                                                                              | ACGTCACGGCCAACTACC           | 85156    | 60bp    |
| UL38_E_R                                                                              | CACTCGGAAAAACGATCCAG         | 85216    |         |
| UL38_F_F                                                                              | GCTGGTGTCTGGGTCAC            | 85277    | 143bp   |
| UL38_F_R                                                                              | GCGTCCAGGTCCACGAAC           | 85420    |         |
| UL38_G_F                                                                              | CCAGGAGCTGTGTGTGTGT          | 85490    | 156bp   |
| UL38_G_R                                                                              | GAAGTCGGGGTTTCGGTTT          | 85646    |         |
| UL38_H_F                                                                              | CATGATGCCCGAGGATAGTC         | 85805    | 84bp    |
| UL38_H_R                                                                              | GCCTCCAGAAATGACAACG          | 85889    |         |
| UL38_I_F                                                                              | CCGCTGTCACTCGTTGTTC          | 85977    | 111bp   |
| UL38_I_R                                                                              | ATTTGCATTTTGTGGCTTCC         | 86088    |         |
| UL39_1_F                                                                              | CCGTGCTCCTGTGAGCTT           | 86251    | 75bp    |
| UL39_1_R                                                                              | AGAGTAGGCGAGAGCAGGTC         | 86326    |         |
| UL39_2_F                                                                              | AGTCAATGGCGTGATGGTG          | 86587    | 96bp    |
| UL39_2_R                                                                              | GGTGCAGTTGGAACCAATT          | 86683    |         |
| UL39_3_F                                                                              | CTCGGAGACGCTGTCACAC          | 87058    | 79bp    |
| UL39_3_R                                                                              | ATGACGAATCGGAGTCAAGG         | 87137    |         |
| UL39_4_F                                                                              | CCTGTGTCTGGACGTTCCCTC        | 87595    | 131bp   |
| UL39_4_R                                                                              | CCCAGGATGCGGTAAAGG           | 87726    |         |
| UL39_5_F                                                                              | CCTCTACGACCACCAGATCG         | 88111    | 82bp    |
| UL39_5_R                                                                              | GGTAGCAGCTGGAGGTGTAG         | 88193    |         |
| UL39_6_F                                                                              | AGATACCCATCCAGGAGCTG         | 88680    | 121bp   |
| UL39_6_R                                                                              | GCGTCTTTGAACATGACGAA         | 88761    |         |
| UL39_7_F                                                                              | CTGTCGGCGATGAAGACC           | 89141    | 80bp    |
| UL39_7_R                                                                              | GCGATACATGCTGCGCTTA          | 89221    |         |
| UL40_1_F                                                                              | TAGCCAATCCATGACCCTGT         | 89662    | 106bp   |
| UL40_1_R                                                                              | CTGTTTTTAgTCCGCGCTTA         | 89768    |         |
| UL40_2_F                                                                              | TCAGCTTTTACCGCTTCCCTC        | 90164    | 104bp   |
| UL40_2_R                                                                              | CATCGAAAACACTACGTGCGATT      | 90268    |         |

Primers for qPCR and ChIP experiments. The position and sequence of the primers are shown. It is also indicated in which experiments the individual primers were used.
