# Supplementary material for: CDK9 and SPT5 proteins are specifically required for expression of herpes simplex virus 1 replication-dependent late genes
Source: PubMed Central journal article supplement (PMC5602406; doi:10.1074/jbc.m117.806000), 2017-07-25
Supplement: 10.1074_M117.806000_jbc.M117.806000-5.pdf [file 10.1074_M117.806000_jbc.M117.806000-5.pdf]

Table S2

|               |               |               |        | DRB (-)      | DRB (+)     | Mock     |                                                                         |
|---------------|---------------|---------------|--------|--------------|-------------|----------|-------------------------------------------------------------------------|
| start         | end           | gene          | strand | counts       | Counts      | counts   | DRB+/DRB-<br>(Normalized to reads mapping to<br>reads mapping to HSV-1) |
| <b>46672</b>  | <b>47802</b>  | <b>UL23/b</b> | -      | <b>7502</b>  | <b>7670</b> | <b>0</b> | <b>1,685695147</b>                                                      |
| 47737         | 48546         | UL24/g1       | +      | 1718         | 1719        | 1        | 1,649732193                                                             |
| 113734        | 115272        | UL54/a        | +      | 5447         | 4902        | 5        | 1,483804432                                                             |
| 26946         | 28502         | UL13/g        | -      | 873          | 753         | 1        | 1,422137095                                                             |
| 28256         | 28915         | UL14/g2       | -      | 411          | 346         | 1        | 1,388017716                                                             |
| <b>25007</b>  | <b>26887</b>  | <b>UL12/b</b> | -      | <b>5822</b>  | <b>4765</b> | <b>2</b> | <b>1,349433341</b>                                                      |
| <b>18224</b>  | <b>20476</b>  | <b>UL8/b</b>  | -      | <b>2096</b>  | <b>1665</b> | <b>2</b> | <b>1,30973578</b>                                                       |
| <b>107010</b> | <b>108125</b> | <b>UL50/b</b> | +      | <b>3764</b>  | <b>2946</b> | <b>2</b> | <b>1,290457958</b>                                                      |
| 127232        | 131128        | RS1/a         | -      | 745          | 583         | 2        | 1,290247464                                                             |
| 2261          | 2317          | RL2/a         | +      | 54           | 42          | 0        | 1,282378602                                                             |
| 134053        | 134928        | US2/g2        | -      | 1367         | 1058        | 0        | 1,276079951                                                             |
| 69633         | 70460         | UL34/g1       | +      | 2509         | 1902        | 2        | 1,249886518                                                             |
| <b>58463</b>  | <b>62053</b>  | <b>UL29/b</b> | -      | <b>7961</b>  | <b>6034</b> | <b>4</b> | <b>1,249678834</b>                                                      |
| 24801         | 25091         | UL11/g        | -      | 2552         | 1899        | 0        | 1,226888306                                                             |
| 29020         | 30048         | UL15/g        | +      | 464          | 344         | 1        | 1,222365811                                                             |
| 48813         | 50555         | UL25/g2       | +      | 2477         | 1805        | 0        | 1,201467236                                                             |
| 142744        | 143223        | US8A/         | +      | 1318         | 957         | 1        | 1,197173954                                                             |
| <b>89926</b>  | <b>90948</b>  | <b>UL40/b</b> | +      | <b>9251</b>  | <b>6632</b> | <b>9</b> | <b>1,18199753</b>                                                       |
| <b>86444</b>  | <b>89857</b>  | <b>UL39/b</b> | +      | <b>9981</b>  | <b>7142</b> | <b>7</b> | <b>1,179794922</b>                                                      |
| <b>20704</b>  | <b>23259</b>  | <b>UL9/b</b>  | -      | <b>4387</b>  | <b>3122</b> | <b>8</b> | <b>1,173345728</b>                                                      |
| 69161         | 69553         | UL33/g2       | +      | 359          | 253         | 0        | 1,1619483                                                               |
| 147105        | 151001        | RS1_2/a       | +      | 822          | 578         | 1        | 1,159355838                                                             |
| 55802         | 58159         | UL28/g        | -      | 2953         | 2072        | 0        | 1,156876599                                                             |
| 141243        | 142895        | US8/g1        | +      | 3859         | 2660        | 4        | 1,136495159                                                             |
| 135222        | 136667        | US3/g1        | +      | 2160         | 1487        | 0        | 1,135057727                                                             |
| 124054        | 124110        | RL2_6/a       | -      | 77           | 53          | 0        | 1,134869375                                                             |
| 67372         | 69162         | UL32/g2       | -      | 1878         | 1290        | 1        | 1,132543403                                                             |
| <b>62807</b>  | <b>66514</b>  | <b>UL30/b</b> | +      | <b>9663</b>  | <b>6537</b> | <b>5</b> | <b>1,115391261</b>                                                      |
| 80713         | 84084         | UL37/g1       | -      | 3897         | 2632        | 3        | 1,113566639                                                             |
| 17135         | 18025         | UL7/g1        | +      | 1813         | 1223        | 0        | 1,112216632                                                             |
| 66459         | 67379         | UL31/g        | -      | 4293         | 2862        | 2        | 1,099181659                                                             |
| 53080         | 55794         | UL27/g1       | -      | 39282        | 25983       | 26       | 1,090577251                                                             |
| 112179        | 113195        | UL53/g        | +      | 2217         | 1449        | 0        | 1,077614495                                                             |
| <b>93113</b>  | <b>94579</b>  | <b>UL42/b</b> | +      | <b>10668</b> | <b>6934</b> | <b>7</b> | <b>1,071671207</b>                                                      |
| 51727         | 52716         | UL26.5/g      | +      | 7453         | 4807        | 5        | 1,063417329                                                             |
| 11823         | 12422         | UL4/a         | -      | 1240         | 799         | 0        | 1,062394531                                                             |
| 50809         | 52716         | UL26/g        | +      | 9504         | 6114        | 5        | 1,060668666                                                             |
| 31386         | 33497         | UL17/g        | -      | 1217         | 773         | 0        | 1,047248261                                                             |
| <b>12483</b>  | <b>15131</b>  | <b>UL5/b</b>  | -      | <b>2948</b>  | <b>1870</b> | <b>4</b> | <b>1,045863146</b>                                                      |
| 143313        | 143585        | US9/g         | +      | 3122         | 1976        | 1        | 1,043553632                                                             |
| 115496        | 116056        | UL55/g2       | +      | 1107         | 696         | 2        | 1,036626605                                                             |
| 70566         | 70904         | UL35/g2       | +      | 3483         | 2189        | 3        | 1,036222503                                                             |
| 43866         | 46382         | UL22/g        | -      | 5785         | 3621        | 6        | 1,032014725                                                             |
| 9884          | 10888         | UL2/b/g1      | +      | 3277         | 2051        | 2        | 1,031929318                                                             |
| 40820         | 41488         | UL20/g1       | -      | 737          | 459         | 1        | 1,026847452                                                             |

|               |               |               |          |             |             |          |                    |
|---------------|---------------|---------------|----------|-------------|-------------|----------|--------------------|
| 137731        | 138009        | US5/g         | +        | 333         | 206         | 0        | 1,019961359        |
| 30174         | 31295         | UL16/g1       | -        | 1771        | 1087        | 0        | 1,011979501        |
| 15130         | 17160         | UL6/g         | +        | 2155        | 1316        | 1        | 1,006860601        |
| 94748         | 96052         | UL43/g        | +        | 876         | 528         | 0        | 0,993780678        |
| 23204         | 24625         | UL10/g2       | +        | 5311        | 3171        | 5        | 0,984420554        |
| 136744        | 137460        | US4/g1        | +        | 5270        | 3146        | 0        | 0,984257732        |
| 36404         | 40528         | UL19/g        | -        | 12788       | 7622        | 13       | 0,982713787        |
| 84531         | 85928         | UL38/g2       | +        | 2819        | 1635        | 1        | 0,956276346        |
| 132644        | 133906        | US1/a         | +        | 13921       | 8042        | 8        | 0,952476715        |
| 35095         | 36051         | UL18/g1       | -        | 4373        | 2519        | 4        | 0,949750263        |
| 145311        | 145577        | US12/a        | -        | 4233        | 2436        | 2        | 0,948832928        |
| 116221        | 116925        | UL56/g2       | -        | 1764        | 1008        | 2        | 0,942155708        |
| 33635         | 34813         | UL15_2/g      | +        | 1249        | 710         | 0        | 0,937252576        |
| 71049         | 80543         | UL36/g2       | -        | 3148        | 1775        | 5        | 0,929660473        |
| 3083          | 3749          | RL2_2/a       | +        | 699         | 393         | 2        | 0,926992258        |
| 98796         | 100952        | UL46/g1       | -        | 11267       | 6232        | 6        | 0,911968594        |
| 108277        | 109011        | UL51/g1       | -        | 944         | 521         | 2        | 0,909968715        |
| <b>109048</b> | <b>112224</b> | <b>UL52/b</b> | <b>+</b> | <b>3662</b> | <b>2005</b> | <b>3</b> | <b>0,902727701</b> |
| 105486        | 106391        | UL49/g?       | -        | 10342       | 5535        | 5        | 0,882416914        |
| 9337          | 10011         | UL1/g1        | +        | 2884        | 1500        | 2        | 0,857544637        |
| 139785        | 140957        | US7/g1        | +        | 9935        | 5161        | 9        | 0,856498723        |
| 122622        | 123288        | RL2_5/a       | -        | 718         | 371         | 2        | 0,851942331        |
| 138419        | 139603        | US6/g         | +        | 9851        | 4977        | 7        | 0,833005855        |
| 98032         | 98550         | UL45/g2       | +        | 4281        | 2117        | 1        | 0,815335519        |
| 42074         | 43681         | UL21/g        | +        | 2483        | 1219        | 0        | 0,809445696        |
| 103607        | 105079        | UL48/g        | -        | 14375       | 6975        | 9        | 0,800013086        |
| 10957         | 11664         | UL3/a         | +        | 1334        | 629         | 0        | 0,777419712        |
| 101035        | 103116        | UL47/g1       | -        | 3444        | 1623        | 2        | 0,776991216        |
| 144761        | 145246        | US11/g2       | -        | 18454       | 8494        | 4        | 0,758896365        |
| 106718        | 106993        | UL49A/        | -        | 888         | 408         | 1        | 0,757544117        |
| 144157        | 145095        | US10/g1       | -        | 35080       | 16080       | 16       | 0,755765725        |
| 120882        | 122485        | RL2_4/a       | -        | 1263        | 557         | 1        | 0,72713086         |
| 3886          | 5489          | RL2_3/a       | +        | 1223        | 539         | 1        | 0,726646256        |
| 91168         | 92637         | UL41/g1       | -        | 3106        | 1361        | 3        | 0,722465988        |
| 96311         | 97846         | UL44/g2       | +        | 13727       | 5318        | 17       | 0,638753704        |

Evaluation of RNA-Seq experiments performed in the presence or absence of 25  $\mu$ M DRB. DRB was added at 6 h.p.i. and cells from the two experiments were harvested at 13 h.p.i.. The total number of reads obtained in the absence of DRB was 3 826 721 and 425 319 reads (11%) mapped to the HSV-1 genome. For the experiment performed in the presence of DRB 3 725 564 reads were obtained and 257 961 reads (6.9%) mapped to the HSV-1 genome. For the mock infection experiment 8 855 884 reads were obtained and 274 mapped to the HSV-1 genome. The early genes (b) are highlighted in bold print. Immediate early and late genes are designated as a, g1 and g2.
